# Supplementary material for: Highly sensitive and fast-response hydrogen sensing of WO3 nanoparticles via palladium reined spillover effect
Source: Royal Society of Chemistry journal article supplement (doi:10.1039/d1nr02870g), 2021-01-01
Supplement: d1nr02870g1.pdf [file d1nr02870g1.pdf]

## Electronic Supplementary Material

### Highly sensitive and fast-response hydrogen sensing of WO<sub>3</sub> nanoparticles via palladium reined spillover effect

Zhengyou Zhu,<sup>#</sup> Xiaxia Xing,<sup>#</sup> Dongliang Feng, Zhenxu Li, Yingying Tian and Dachi Yang\*

Tianjin Key Laboratory of Optoelectronic Sensor and Sensing Network Technology and Department of Electronics, College of Electronic Information and Optical Engineering, Nankai University, Tianjin 300350, China.

\* E-mail: yangdachi@nankai.edu.cn

<sup>#</sup> These authors (Z. Zhu and X. Xing) contributed equally to this study.

## Outline

### Experimental details

**Fig. S1** Recorded transitions of the reactant during the hydrolysis of  $WCl_6$  ethanol solution.

**Fig. S2** Synthetic scheme of Pd-NPs@ $WO_3$ -NPs.

**Fig. S3** SEM images of precursor prior to annealing,  $WO_3$ -NPs and various Pd-NPs@ $WO_3$ -NPs.

**Fig. S4** XRD pattern of the hydrolysis product without annealing.

**Fig. S5** XRD patterns and photo images of  $WO_3$ -NPs and various Pd-NPs@ $WO_3$ -NPs.

**Fig. S6** The EDS elemental mapping of Pd-NPs@ $WO_3$ -NPs with applied 25  $\mu M$   $Pd^{2+}$  in the precursors.

**Fig. S7.** The EDS elemental mapping of Pd-NPs@ $WO_3$ -NPs with applied 100  $\mu M$   $Pd^{2+}$  in the precursors.

**Fig. S8.** The EDS elemental mapping of Pd-NPs@ $WO_3$ -NPs with applied 150  $\mu M$   $Pd^{2+}$  in the precursors.

**Fig. S9** XPS spectrum of  $WO_3$ -NPs and Pd-NPs@ $WO_3$ -NPs.

**Fig. S10** Hydrogen responses of various Pd-NPs@ $WO_3$ -NPs.

**Fig. S11** Response / recovery curve of  $WO_3$ -NPs after ageing process.

**Fig. S12** Mott-Schottky plots of  $WO_3$ -NPs and Pd-NPs@ $WO_3$ -NPs.

**Table S1** Comparison of various hydrogen sensors based on precious metal decorated metal oxides.

**Table S2** The  $H_2$  and  $O_2$  adsorption energy of the DFT calculation and comparison.

### References

## Experimental details

### Synthesis of WO<sub>3</sub>-NPs and Pd-NPs@WO<sub>3</sub>-NPs

Pristine WO<sub>3</sub>-NPs were synthesized by hydrolysis of WCl<sub>6</sub> in ethanol solution and subsequent pyrolysis treatment. Specifically, 0.8 g WCl<sub>6</sub> was firstly added into 160 mL ethanol under continuous sonication for 30 min to obtain a transparent yellow solution. Secondly, the above solution was aged for 48 h at near room temperature (25~30 °C, relative humidity of 60~70%). Thirdly, deep blue floccules formed in the beaker, which were subsequently collected by filtration and rinsed with ethanol and distilled water thoroughly, followed by drying at 60 °C for 2 h. Finally, WO<sub>3</sub>-NPs were obtained by pyrolysis treatment to the blue powder via heating at 600 °C for 2 h in a muffle furnace (KSL1100X, Hefei Kejing Materials Technology Co. Ltd, China).

For the photochemical synthesis of Pd-NPs@WO<sub>3</sub>-NPs, 50 mg as-prepared WO<sub>3</sub>-NPs (powder) was dispersed in a mixture containing 80 mL deionized (D. I.) water and 20 mL methanol by sonication. Afterward, various volume (0.05, 0.1, 0.5, 1, 2, and 3 mL) of PdCl<sub>2</sub> (5 mM, dissolved by HCl assistance) aqueous solution was added, which was then UV-irradiated with irradiation distance of ~ 5 cm under stirring for 120 s by a Xenon light source (CEL-HXUV300, Beijing Zhongjiao Jinyuan Technology Co., Ltd). Finally, the precipitate was separated by filtrating and rinsing in D. I. water, followed by drying at 60 °C for 1 h. According to the feeding of PdCl<sub>2</sub> precursor, the Pd<sup>2+</sup> concentrations were 2.5, 5, 25, 50, 100, 150 μM, respectively.

### Characterizations

The samples of sensing materials were characterized using field emission scanning electron microscopy (FE-SEM, JEOL-6701F, at 2kV), transmission electron microscopy (TEM, JEM-2200FS) with high-resolution TEM (HRTEM) and selective area electron diffraction (SEAD) patterns, X-ray diffraction (XRD, Rigaku Smart Lab 3 kW) with Cu Kα radiation (2.2 kW) and X-ray photoelectron spectroscopy (XPS, Thermo Scientific ESCALAB 250Xi).

### Hydrogen sensing measurements

As-prepared samples were mixed with terpenol to make a uniform paste. The paste was then coated

on a ceramic tube printed with a pair of Au electrodes, followed by drying at 60 °C in an oven for 2 h. A Ni-Cr alloy wire was inserted into the tube to tune the working temperature. Hydrogen sensing test was carried out employing a static testing device (WS-30B system, Weisheng Instruments Co., Zhengzhou, China). The response of hydrogen is calculated by  $S = R_g/R_a$ , where  $R_g$  and  $R_a$  are the resistances in the target gas and air atmosphere, respectively. The response or recovery time is counted as the time taken by the sensor to reach 90% of the saturation signal after hydrogen in or hydrogen off. The ambient temperature and relative humidity during the test were 27 °C and ~70%, respectively. Prior to the test at 50 °C, the sensor was heated at 200 °C for 10 min cycling test to get activated.

### Capacitance-voltage (C-V) test

Capacitance-voltage (C-V) test was carried out on the electrode/electrolyte at an electrochemistry workstation (VersaSTAT 4, AMETEK Princeton) to understand the Schottky contacts based on the Mott-Schottky equation, <sup>1,2</sup>

$$\frac{1}{C^2} = \frac{2}{N_D e \epsilon_0 \epsilon} \left( E - E_{FB} - \frac{kT}{e} \right)$$

where  $C$  is the space charge capacitance,  $N_D$  represents the carrier density,  $e$  is the elemental charge,  $\epsilon_0$  and  $\epsilon$  are respectively denoted as the permittivity of the vacuum and the semiconductor,  $E$  is the applied potential,  $E_{FB}$  is the flat band potential,  $T$  is the temperature and  $k$  is the Boltzmann constant.

### Theoretical modulation

Density functional theory (DFT) calculation was performed by using the CP2K package. <sup>3</sup> PBE functional <sup>4</sup> with Grimme D3 correction <sup>5</sup> was used to describe the system. Unrestricted Kohn-Sham DFT has been used as the electronic structure method in the framework of the Gaussian and plane waves method. <sup>6,7</sup> The Goedecker-Teter-Hutter (GTH) pseudopotentials, <sup>8,9</sup> DZVPMOLOPT-GTH basis sets <sup>6</sup> were utilized to describe the molecules. A plane-wave energy cut-off of 500 Ry has been employed. We used a unit cell of (4×4) with four atomic layers of WO<sub>3</sub> to model the surface. The Pd-NPs@WO<sub>3</sub>-NPs is modeled with Pd10 clusters on the WO<sub>3</sub> surface. All the simulations were

carried out by keeping the two bottom  $\text{WO}_3$  layers fixed at the initial coordinates in order to maintain the bulk behavior of the inner part of the slab. The adsorption energy is defined as  $E_{ad} = E_{mol/sur} - E_{mol} - E_{sur}$ , where  $E_{ad}$  is adsorption energy and  $E_{mol/sur}$  is total energy for molecule on surface.  $E_{mol}$  and  $E_{sur}$  are the energy of isolated molecule and surface, respectively.

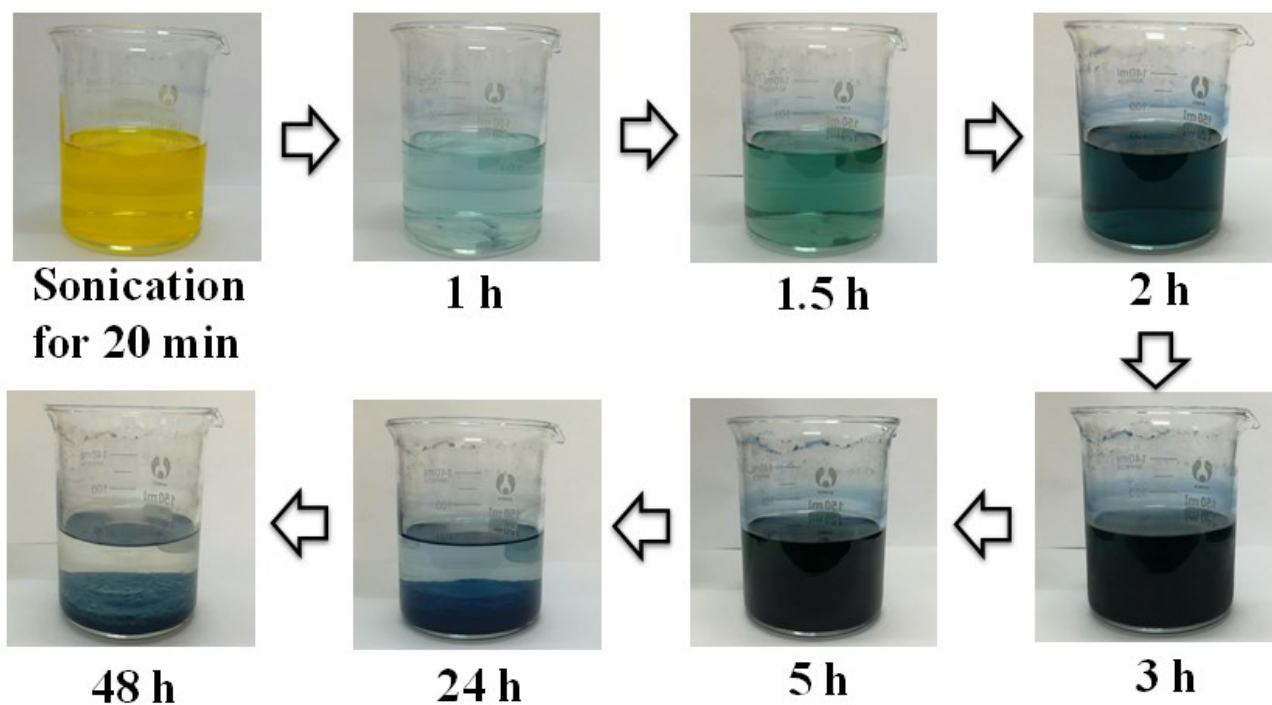

**Fig. S1.** Color transitions of the reactant during the hydrolysis of  $\text{WCl}_6$  in ethanol solution at room temperature.

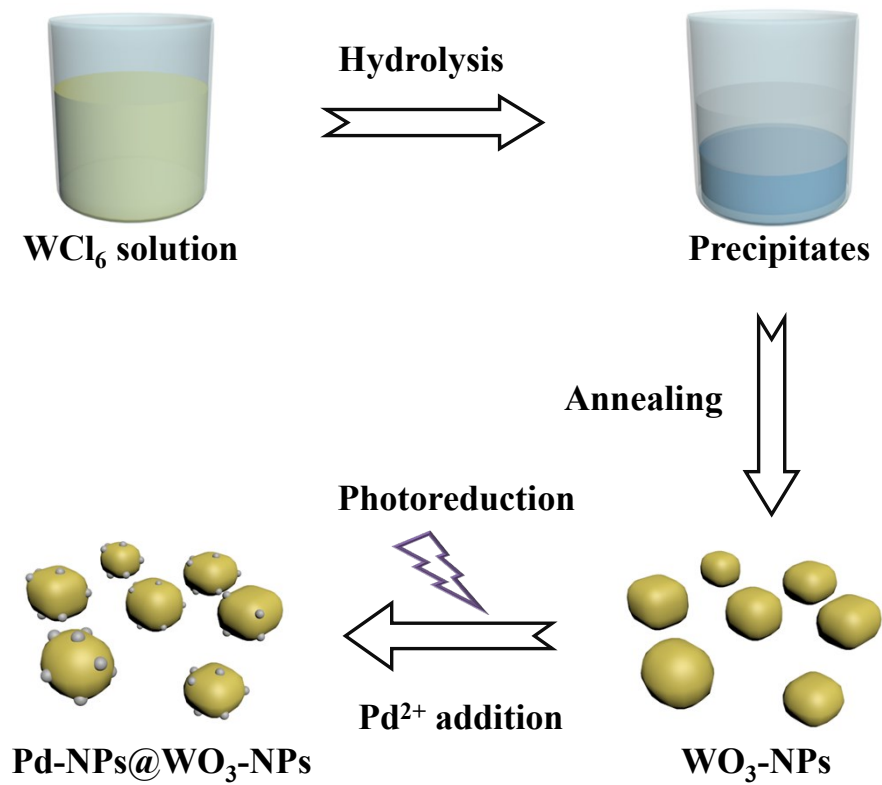

**Fig. S2.** Synthetic scheme of Pd-NPs@WO<sub>3</sub>-NPs via combined hydrolysis, annealing and photochemical deposition.

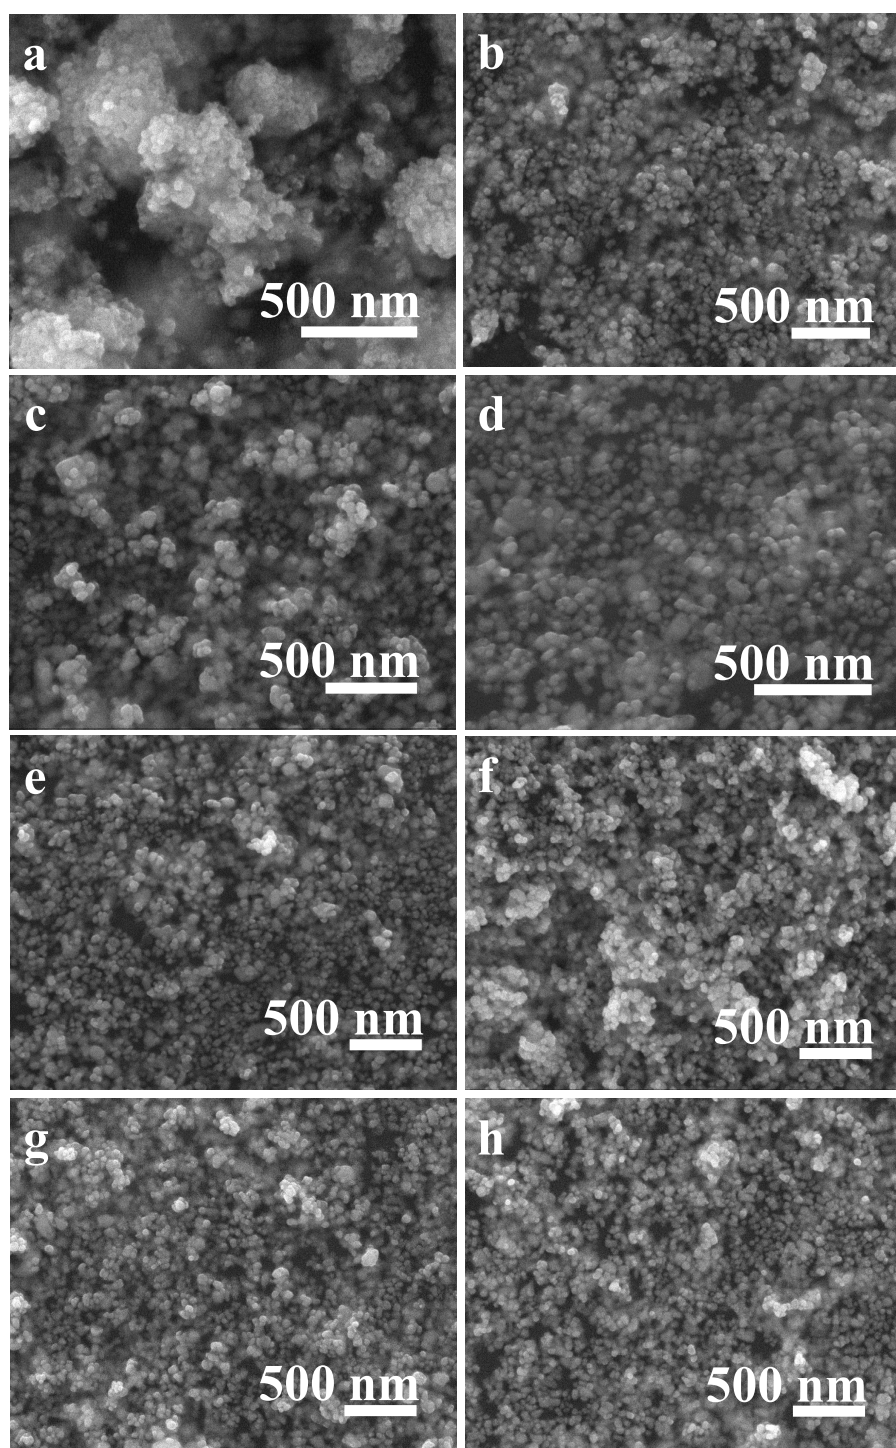

**Fig. S3.** The SEM images of the (a) precursor prior to annealing, (b) pristine WO<sub>3</sub>-NPs, and Pd-NPs@WO<sub>3</sub>-NPs containing various concentrations of Pd<sup>2+</sup> in the precursors of (c) 2.5, (d) 5, (e) 25, (f) 50, (g) 100, (h) 150 μM.

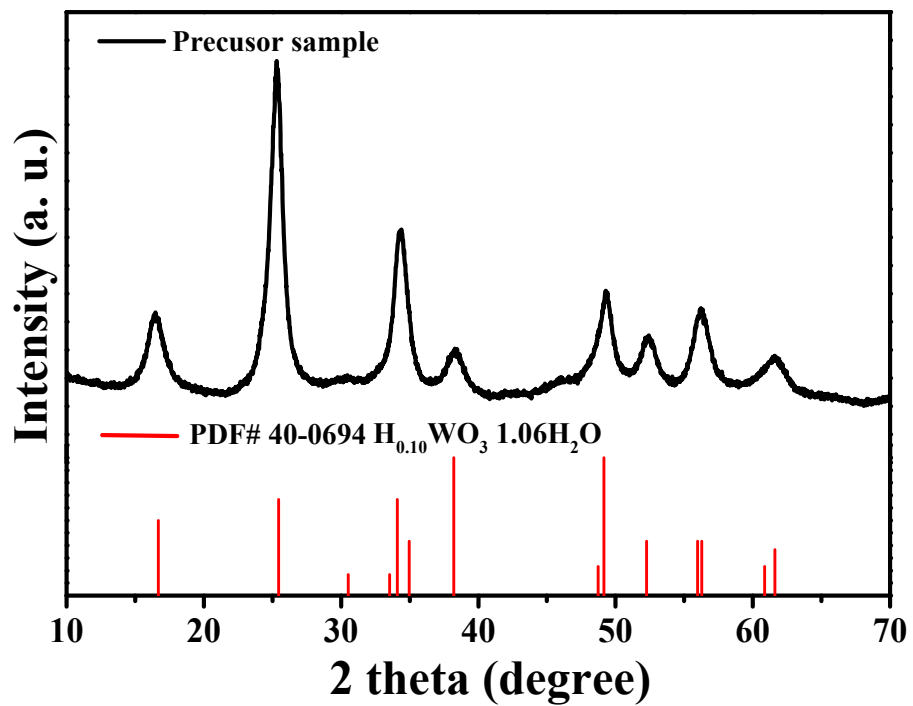

Fig. S4. XRD pattern of the hydrolysis product without annealing.



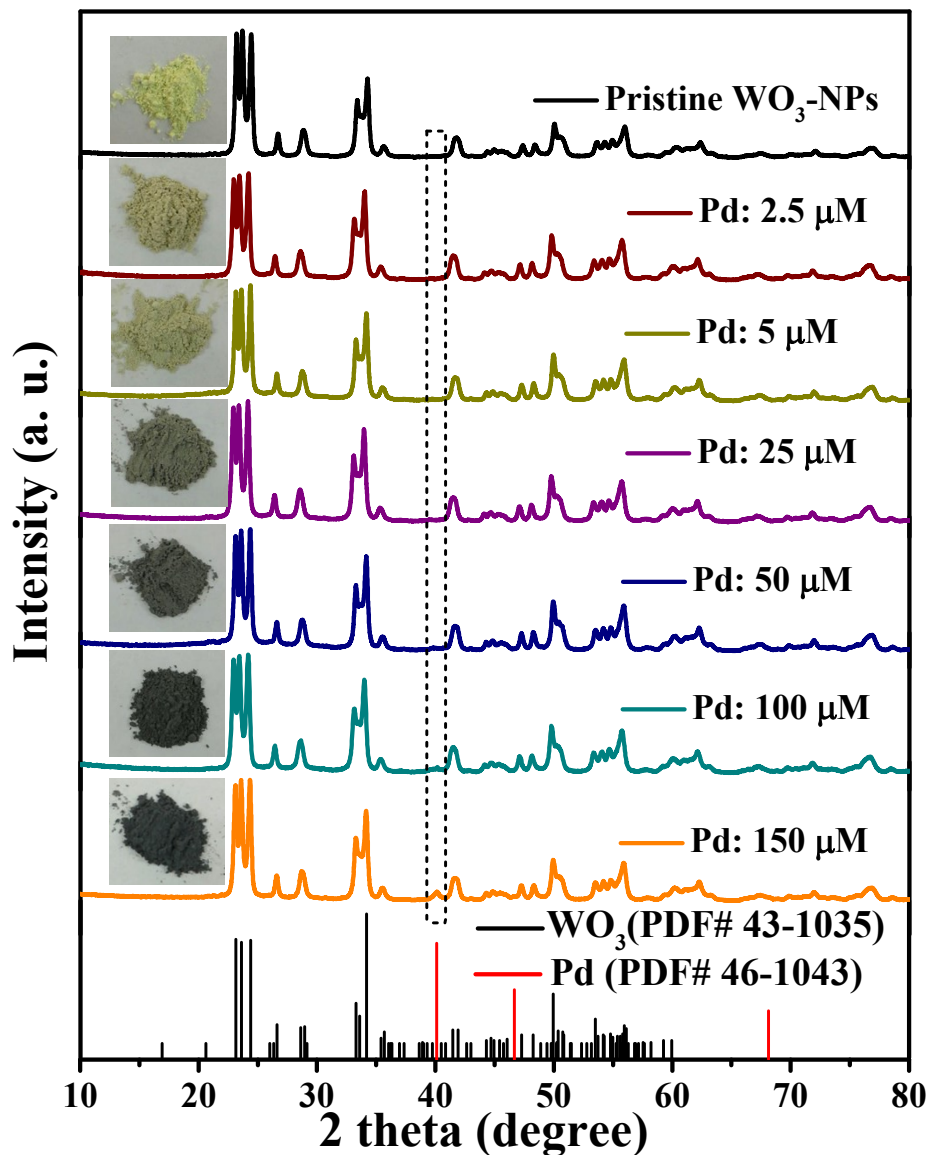

**Fig. S5.** XRD patterns and the corresponding photos of pristine  $\text{WO}_3$ -NPs and those containing with applied various concentrations of  $\text{Pd}^{2+}$  in the precursors.

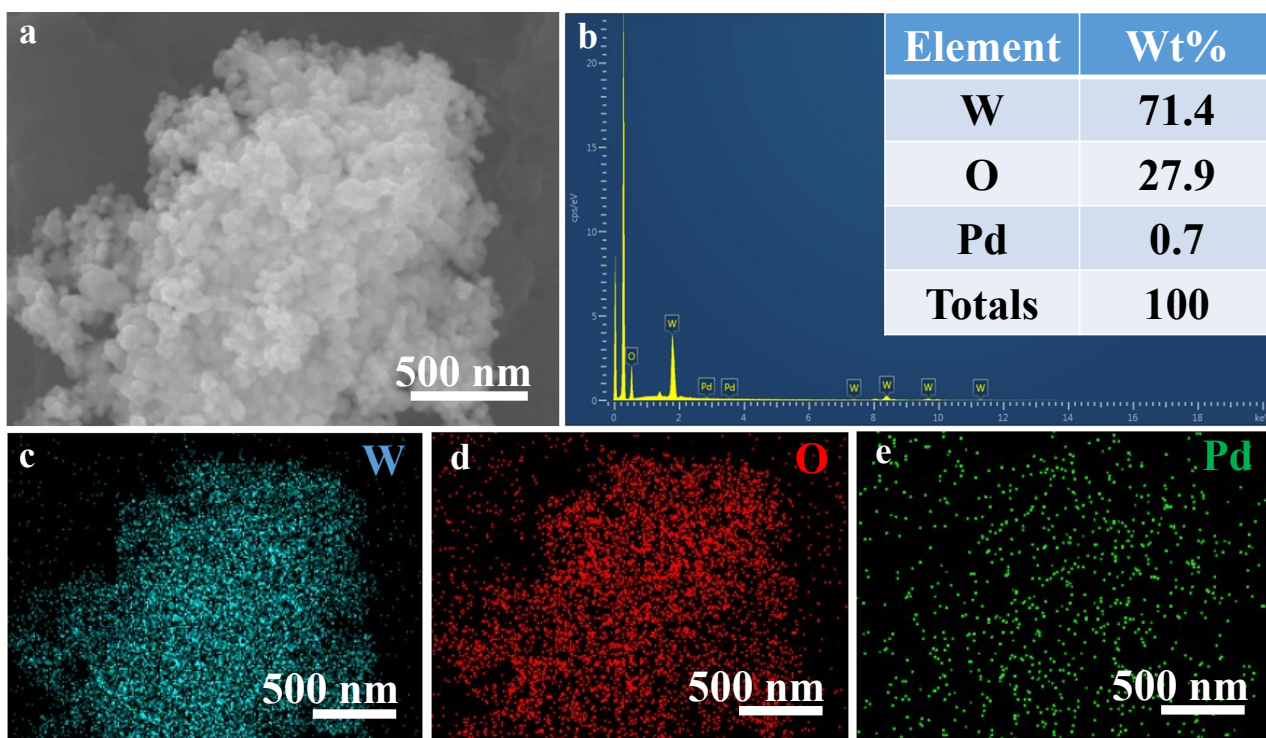

**Fig.S6** The EDS elemental mapping of Pd-NPs@WO<sub>3</sub>-NPs with applied 25 μM Pd<sup>2+</sup> in the precursors.

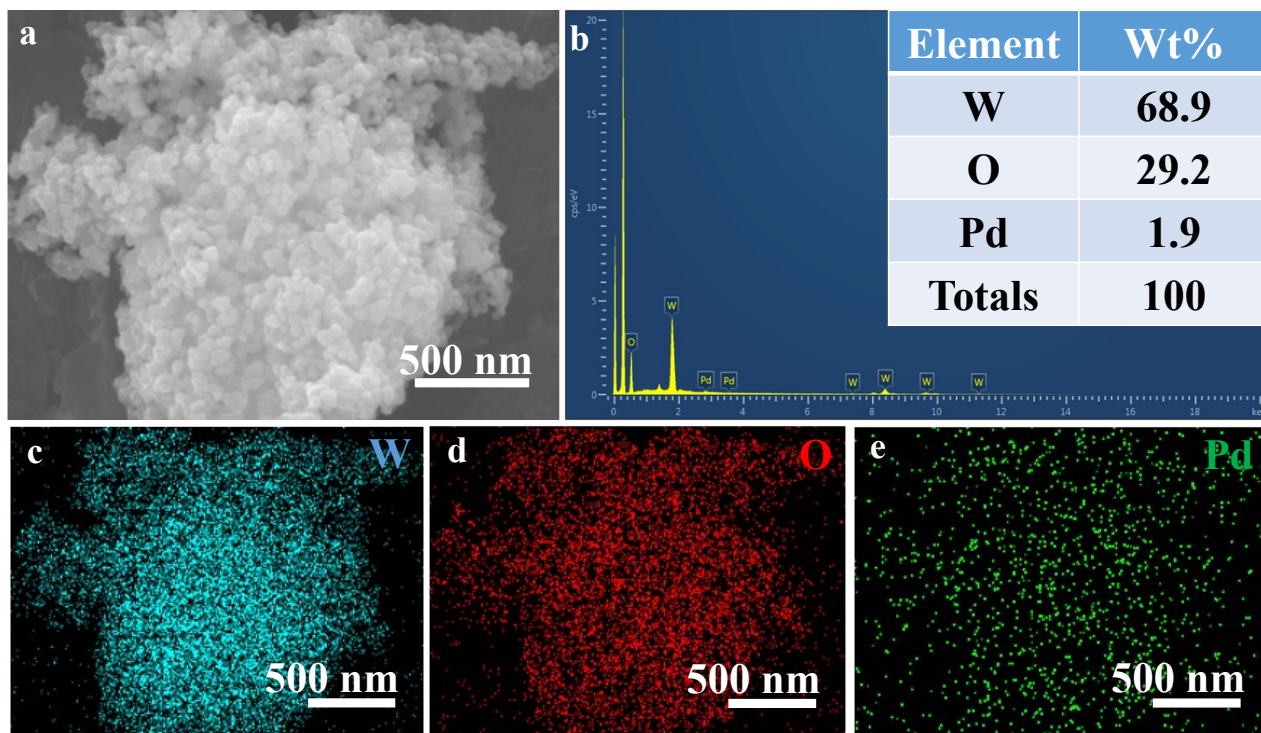

**Fig. S7.** The EDS elemental mapping of Pd-NPs@WO<sub>3</sub>-NPs with applied 100 μM Pd<sup>2+</sup> in the precursors.

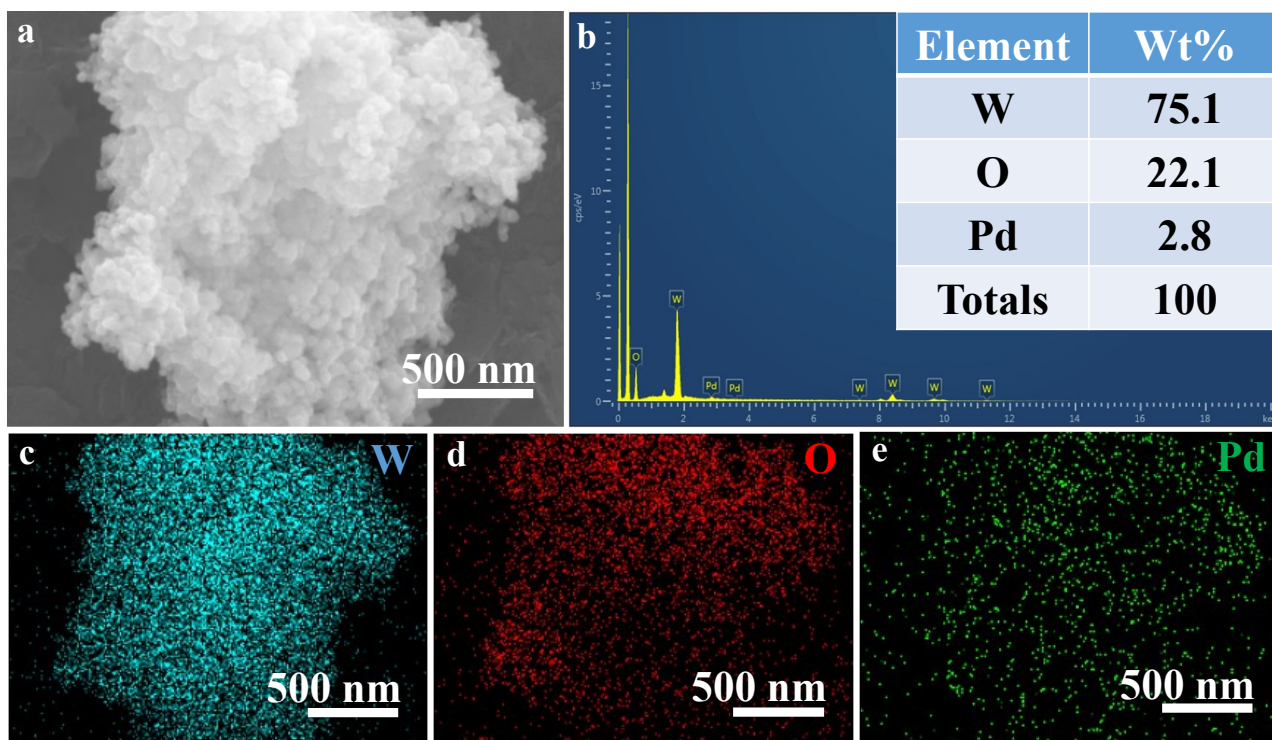

**Fig. S8.** The EDS elemental mapping of Pd-NPs@WO<sub>3</sub>-NPs with applied 150 μM Pd<sup>2+</sup> in the precursors.

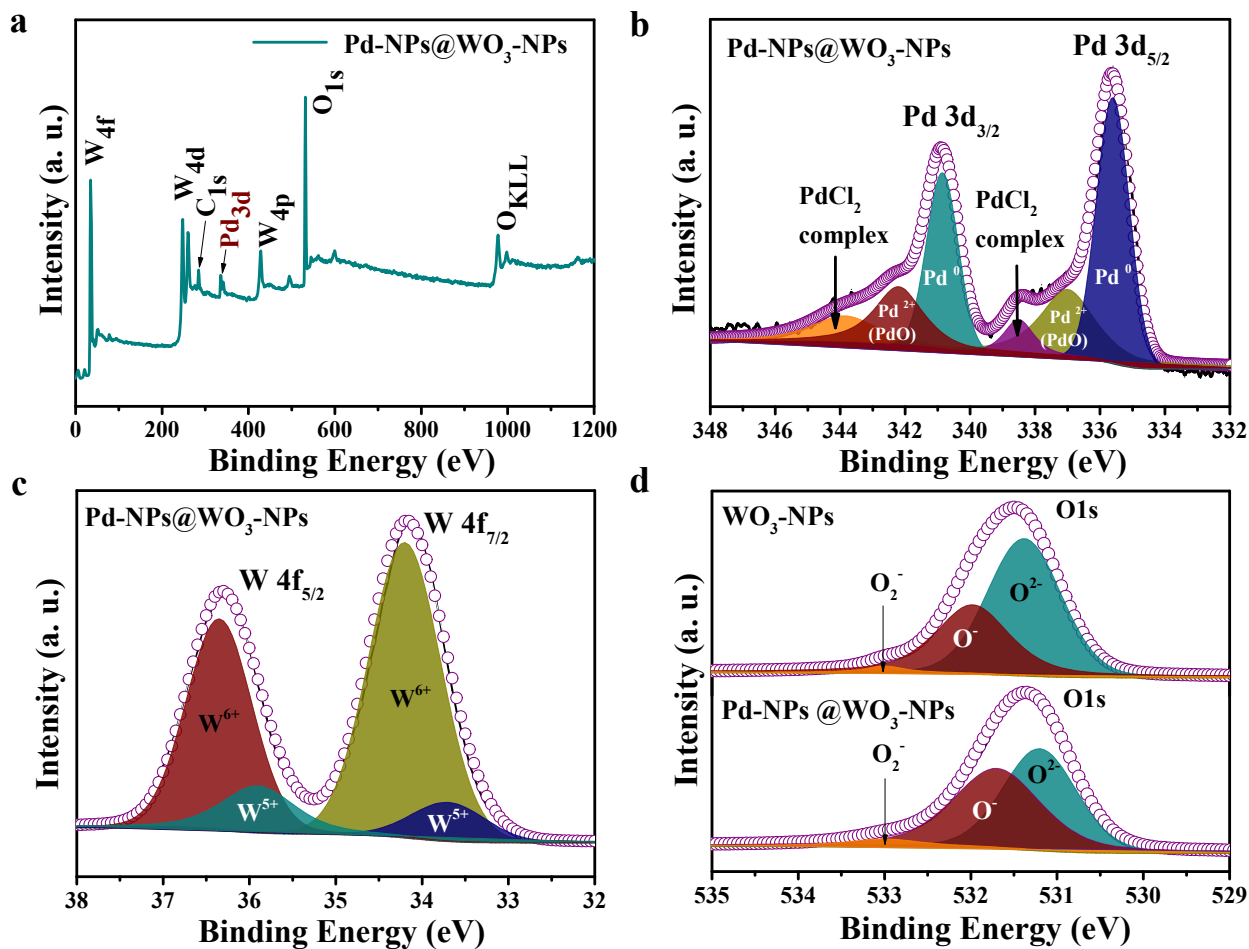

**Fig. S9.** (a) Survey scan XPS spectrum, (b) Pd 3d spectrum, (c) W 4f spectrum of Pd-NPs@WO<sub>3</sub>-NPs, and (d) O 1s spectra of Pd-NPs@WO<sub>3</sub>-NPs (Bottom-panel) with pristine WO<sub>3</sub>-NPs (Top-panel) for comparison.

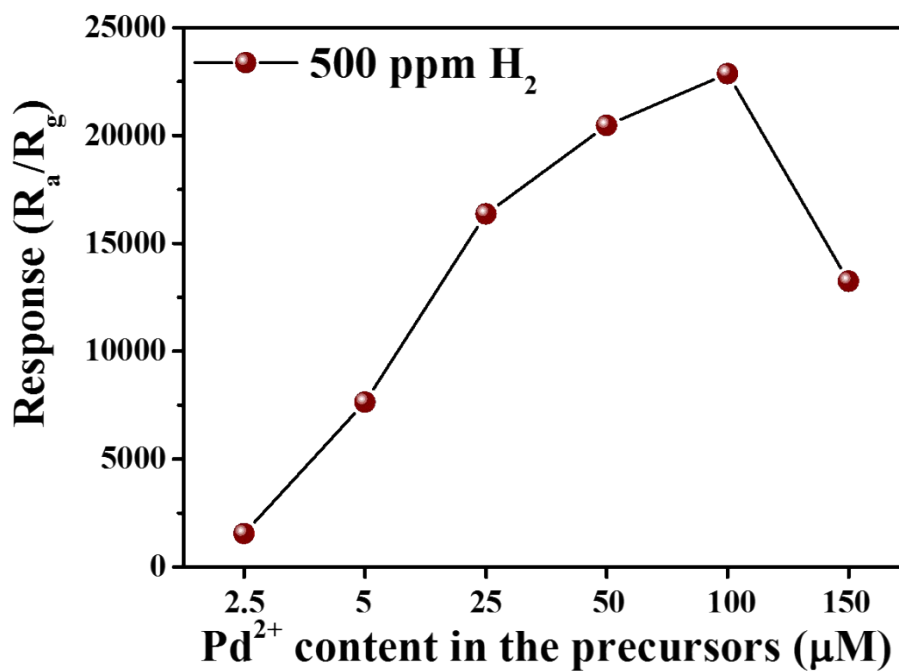

**Fig. S10.** Hydrogen response of the Pd-NPs@WO<sub>3</sub>-NPs sensor to 500 ppm hydrogen with applied various concentrations of Pd<sup>2+</sup> in the precursors.

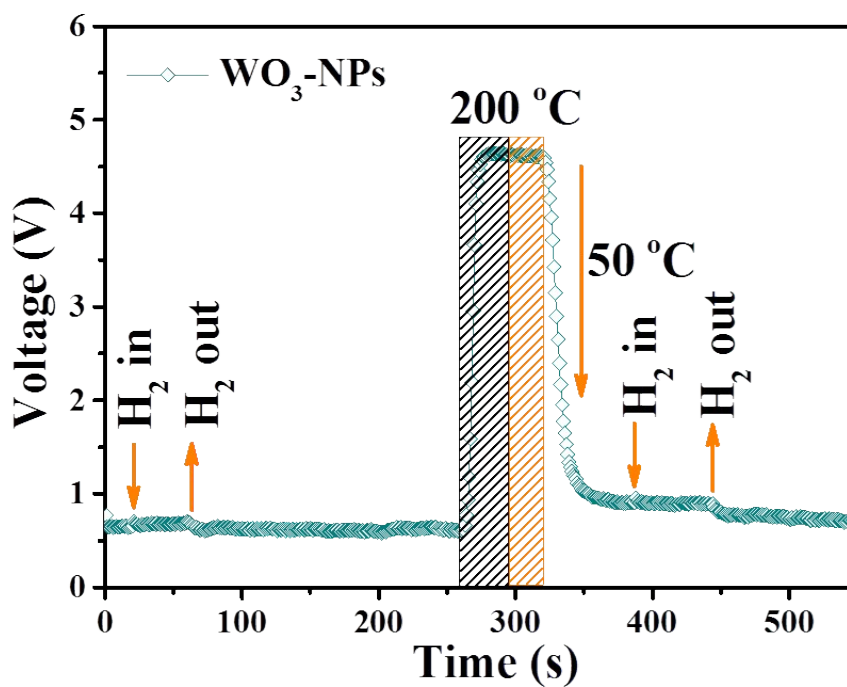

**Fig. S11.** Response / recovery curve of WO<sub>3</sub>-NPs after ageing process.

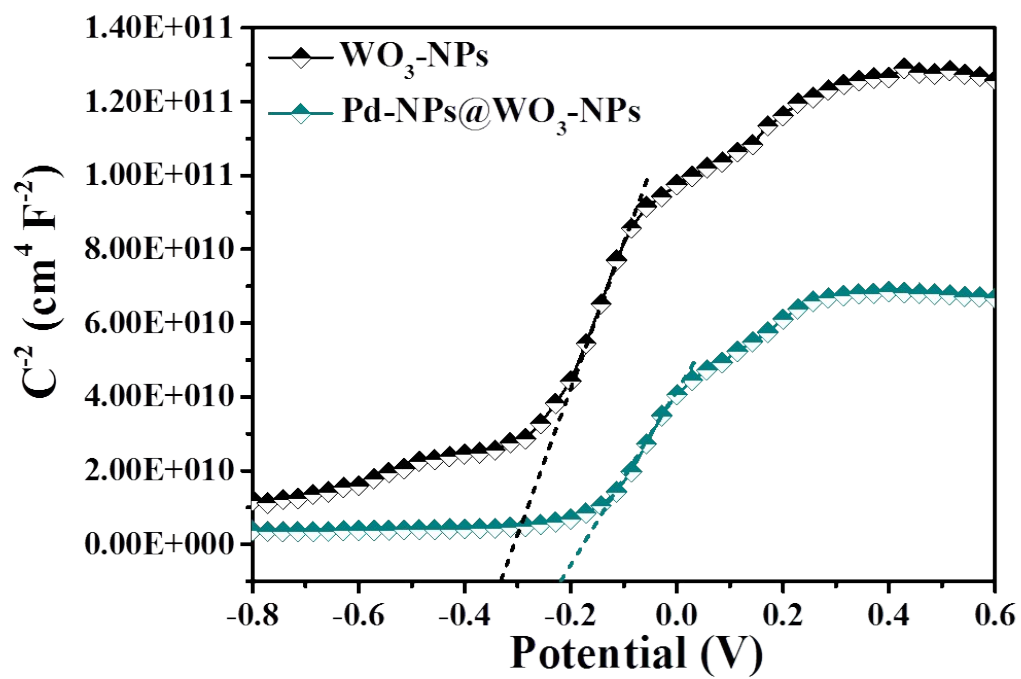

**Fig. S12.** Mott-Schottky plots of  $\text{WO}_3$ -NP and Pd-NPs@ $\text{WO}_3$ -NPs.



**Table S1** Comparison of various hydrogen sensors based on precious metal decorated metal oxides.

| Materials/<br>Structures                       | Operating<br>Temperature<br>(°C) | Hydrogen<br>response<br>@concentration | Detection<br>limit | Response/Rec<br>overy Time         | Refs.         |
|------------------------------------------------|----------------------------------|----------------------------------------|--------------------|------------------------------------|---------------|
| <b>Pt-In<sub>2</sub>O<sub>3</sub> nanocube</b> | Room<br>Temperature              | ~20 @1.5 vol%                          | 0.5 vol%           | 33 s/ 66 s@ 1.5<br>vol%            | 10            |
| <b>Au@ZnO<br/>nanoparticle</b>                 | 300                              | 103.9@100 ppm                          | 0.5 ppm            | 75 s/ 600 s<br>@100 ppm            | 11            |
| <b>Pt-SnO<sub>2</sub> nanowire</b>             | 100                              | 118@1000ppm                            | 100 ppm            | -/-                                | 12            |
| <b>Pd-SnO<sub>2</sub> film</b>                 | 300                              | 28@250 ppm                             | 25 ppm             | 3 s/ 50 s@250<br>ppm               | 13            |
| <b>Pd-SnO<sub>2</sub> nanowires</b>            | 400                              | 5.51@100 ppm                           | 10 ppm             | 35 s/ 30 s@100<br>ppm              | 14            |
| <b>Pt-WO<sub>3</sub> nanorod</b>               | 200                              | ~1600@150<br>ppm                       | 100                | ~5.5 min/ ~15<br>min @ 3000<br>ppm | 15            |
| <b>Pd-3DOM WO<sub>3</sub></b>                  | 130                              | 382@50 ppm                             | 5 ppm              | 10 s/ 50 s @50<br>ppm              | 16            |
| <b>Pd-WO<sub>3</sub> nanoplates</b>            | Room<br>Temperature              | 34@ 0.1 vol%                           | 0.05 vol%          | 54 s/ - @0.05<br>vol%              | 17            |
| <b>Pd-WO<sub>3</sub> nanotubes</b>             | 450                              | 17.6@500 ppm                           | 5 ppm              | 25 s/- @500<br>ppm                 | 18            |
| <b>Pd-WO<sub>3</sub> nanoplates</b>            | 80                               | 169.3@0.1<br>vol%                      | 0.1 vol%           | 42.8 s/ 48.5<br>s@0.1 vol%         | 19            |
| <b>Pd-NPs@WO<sub>3</sub>-NPs</b>               | ~50                              | 22867@500<br>ppm                       | 5 ppm              | 1.2 s/ 5~99 s<br>@500 ppm          | This<br>study |

**Table S2** The H<sub>2</sub> and O<sub>2</sub> adsorption energy of the DFT calculation and comparison.

|                                  | O <sub>2</sub> adsorption energy<br>(E <sub>ad</sub> ) / eV | H <sub>2</sub> adsorption energy<br>(E <sub>ad</sub> ) / eV |
|----------------------------------|-------------------------------------------------------------|-------------------------------------------------------------|
| <b>WO<sub>3</sub>-NPs</b>        | -1.05                                                       | -2.8                                                        |
| <b>Pd-NPs@WO<sub>3</sub>-NPs</b> | -1.86                                                       | -0.53                                                       |

## References

1. Z. Zhang, Y. Yu and P. Wang, *ACS Appl. Mater. Interfaces*, 2012, **4**, 990-996.
2. M. Ye, J. Gong, Y. Lai, C. Lin and Z. Lin, *J. Am. Chem. Soc.*, 2012, **134**, 15720-15723.
3. J. Hutter, M. Iannuzzi, F. Schiffmann and J. Vandevondele, *Wires. Comput. Mol. Sci.*, 2014, **4**, 15-25.
4. Y. Zhang and W. Yang, *Phys. Rev. Lett.*, 1998, **80**, 890-890.
5. S. Grimme, *J. comput. Chem.*, 2006, **27**, 1787-1799.
6. J. VandeVondele and J. Hutter, *J. chem. Phy.*, 2007, **127**, 114105.
7. J. VandeVondele, M. Krack, F. Mohamed, M. Parrinello, T. Chassaing and J. Hutter, *Comput. Phys. Commun.*, 2005, **167**, 103-128.
8. S. Goedecker, M. Teter and J. Hutter, *Phys. Rev. B*, 1996, **54**, 1703.
9. C. Hartwigsen, S. Goedecker and J. Hutter, *Phys. Rev. B*, 1998, **58**, 3641.
10. Y. Wang, B. Liu, D. Cai, L. Han, L. Yuan, D. Wang, L. Wang, Q. Li and T. Wang, *Sens. Actuators B Chem.*, 2014, **201**, 351-359.
11. S. M. Majhi, P. Rai and Y. T. Yu, *ACS Appl. Mater. Interfaces*, 2015, **7**, 9462-9468.
12. Y. Shen, YAMAZAKI, Toshinari, Z. Liu, D. Meng, KIKUTA and Toshio, *J. Alloy. Compd.*, 2009, **488**, L21-L25.
13. N. V. Toan, N. V. Chien, N. V. Duy, H. S. Hong, H. Nguyen, N. D. Hoa and N. V. Hieu, *J. Hazard. Mater.*, 2016, **301**, 433-442.
14. K. Nguyen, C. M. Hung, T. M. Ngoc, D. T. Thanh Le, D. H. Nguyen, D. Nguyen Van and H. Nguyen Van, *Sens. Actuators B Chem.*, 2017, **253**, 156-163.
15. M. Horprathum, T. Srichaiyaperk, B. Samransuksamer, A. Wisitsoraat, P. Eiamchai, S. Limwichean, C. Chananonwathorn, K. Aiempnanakit, N. Nuntawong and V. Patthanasettakul, *ACS Appl. Mater. Interfaces*, 2014, **6**, 22051-22060.
16. Z. Wang, S. Huang, G. Men, D. Han and F. Gu, *Sens. Actuators B Chem.*, 2018, **262**, 577-587.
17. B. Liu, D. Cai, L. Yuan, D. Wang, L. Wang, Y. Wang, L. Han, Q. Li and T. Wang, *Sens. Actuators B Chem.*, 2014, **193**, 28-34.
18. S. J. Choi, S. Chattopadhyay, J. J. Kim, S. J. Kim, H. L. Tuller, G. C. Rutledge and I. D. Kim, *Nanoscale*, 2015, **8**, 9159.
19. Y. Wang, B. Liu, H. Li, L. Wang, D. Cai, D. Wang, Y. Liu, Q. Li, T. Wang and S. Xiao, *J. Mater. Chem. A*, 2014, **3**, 1317-1324.
